# Supplementary material for: Dietary Administration of Black Raspberries and Arsenic Exposure: Changes in the Gut Microbiota and Its Functional Metabolites
Source: MDPI journal article supplement (doi:10.3390/metabo13020207), 2023-01-30
Supplement: s1 [file s1]

## Supplementary Information

# Dietary Administration of Black Raspberries and Arsenic Exposure: Changes in the Gut Microbiota and Its Functional Metabolites

Pengcheng Tu <sup>1</sup>, Qiong Tang <sup>2</sup>, Zhe Mo <sup>1</sup>, Huixia Niu <sup>1</sup>, Yang Hu <sup>1</sup>, Lizhi Wu <sup>1</sup>, Zhijian Chen <sup>1</sup>, Xiaofeng Wang <sup>1,\*</sup> and Bei Gao <sup>3,4,\*</sup>

<sup>1</sup> Department of Environmental Health, Zhejiang Provincial Center for Disease Control and Prevention, 3399 Binsheng Road, Hangzhou 310051, China

<sup>2</sup> College of Standardization, China Jiliang University, Hangzhou 310018, China

<sup>3</sup> School of Marine Sciences, Nanjing University of Information Science and Technology, Nanjing 210044, China

<sup>4</sup> Key Laboratory of Hydrometeorological Disaster Mechanism and Warning of Ministry of Water Resources, Nanjing University of Information Science and Technology, Nanjing 210044, China

\* Correspondence: xfwang@cdc.zj.cn (X.W.); wintergb2012@gmail.com (B.G.)

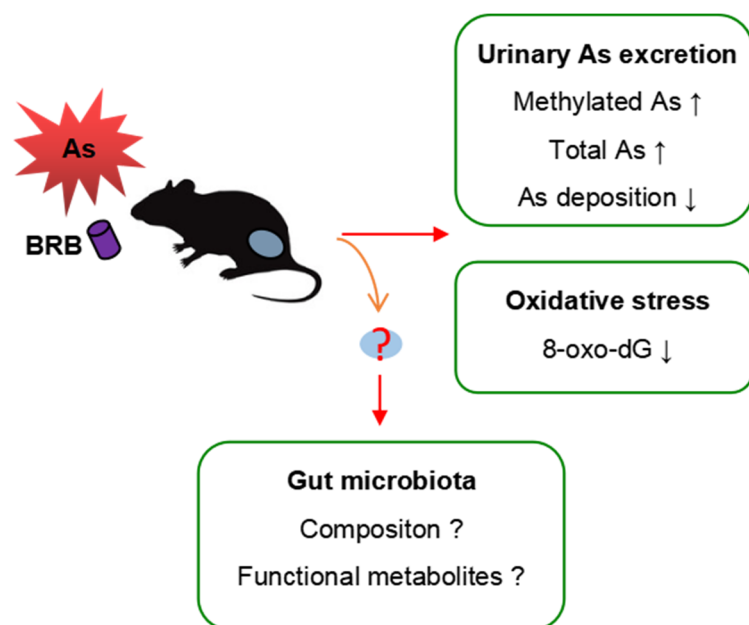

**Figure S1.** Illustration of effects of BRB consumption on As biotransformation/toxicity.

## Order level:

| Legend                                                                            | Taxonomy                                                              |
|-----------------------------------------------------------------------------------|-----------------------------------------------------------------------|
|  | Unassigned;Other;Other;Other                                          |
|  | k_Bacteria;p_Actinobacteria;c_Actinobacteria;o_Actinomycetales        |
|  | k_Bacteria;p_Actinobacteria;c_Actinobacteria;o_Bifidobacteriales      |
|  | k_Bacteria;p_Actinobacteria;c_Coriobacteriia;o_Coriobacteriales       |
|  | k_Bacteria;p_Bacteroidetes;c_Bacteroidia;o_Bacteroidales              |
|  | k_Bacteria;p_Cyanobacteria;c_Chloroplast;o_Streptophyta               |
|  | k_Bacteria;p_Firmicutes;o_Bacilli;Other                               |
|  | k_Bacteria;p_Firmicutes;o_Bacilli;o_Bacillales                        |
|  | k_Bacteria;p_Firmicutes;o_Bacilli;o_Lactobacillales                   |
|  | k_Bacteria;p_Firmicutes;o_Bacilli;o_Turicibacteriales                 |
|  | k_Bacteria;p_Firmicutes;o_Clostridia;o_Clostridiales                  |
|  | k_Bacteria;p_Firmicutes;o_Erysipelotrichi;o_Erysipelotrichales        |
|  | k_Bacteria;p_Proteobacteria;c_Alphaproteobacteria;o_Caulobacteriales  |
|  | k_Bacteria;p_Proteobacteria;c_Alphaproteobacteria;o_Rickettsiales     |
|  | k_Bacteria;p_Proteobacteria;c_Gammaproteobacteria;o_Enterobacteriales |
|  | k_Bacteria;p_Tenericutes;o_Mollicutes;o_Anaeroplasmatales             |
|  | k_Bacteria;p_Tenericutes;o_Mollicutes;o_RF39                          |
|  | k_Bacteria;p_Verrucomicrobia;o_Verrucomicrobiae;o_Verrucomicrobiales  |

## Family level:

| Legend                                                                              | Taxonomy                                                                                   |
|-------------------------------------------------------------------------------------|--------------------------------------------------------------------------------------------|
|    | Unassigned;Other;Other;Other                                                               |
|    | k_Bacteria;p_Actinobacteria;c_Actinobacteria;o_Actinomycetales;f_Pseudonocardiaceae        |
|    | k_Bacteria;p_Actinobacteria;c_Actinobacteria;o_Bifidobacteriales;f_Bifidobacteriaceae      |
|    | k_Bacteria;p_Actinobacteria;c_Coriobacteriia;o_Coriobacteriales;f_Coriobacteriaceae        |
|    | k_Bacteria;p_Bacteroidetes;c_Bacteroidia;o_Bacteroidales;f_                                |
|    | k_Bacteria;p_Bacteroidetes;c_Bacteroidia;o_Bacteroidales;f_Bacteroidaceae                  |
|    | k_Bacteria;p_Bacteroidetes;c_Bacteroidia;o_Bacteroidales;f_Rikenellaceae                   |
|   | k_Bacteria;p_Bacteroidetes;c_Bacteroidia;o_Bacteroidales;f_S24-7                           |
|  | k_Bacteria;p_Cyanobacteria;c_Chloroplast;o_Streptophyta;f_                                 |
|  | k_Bacteria;p_Firmicutes;o_Bacilli;Other;Other                                              |
|  | k_Bacteria;p_Firmicutes;o_Bacilli;o_Bacillales;f_Bacillaceae                               |
|  | k_Bacteria;p_Firmicutes;o_Bacilli;o_Bacillales;f_Paenibacillaceae                          |
|  | k_Bacteria;p_Firmicutes;o_Bacilli;o_Bacillales;f_Planococcaceae                            |
|  | k_Bacteria;p_Firmicutes;o_Bacilli;o_Bacillales;f_Staphylococcaceae                         |
|  | k_Bacteria;p_Firmicutes;o_Bacilli;o_Bacillales;f_Thermoactinomycetaceae                    |
|  | k_Bacteria;p_Firmicutes;o_Bacilli;o_Lactobacillales;Other                                  |
|  | k_Bacteria;p_Firmicutes;o_Bacilli;o_Lactobacillales;f_Enterococcaceae                      |
|  | k_Bacteria;p_Firmicutes;o_Bacilli;o_Lactobacillales;f_Lactobacillaceae                     |
|  | k_Bacteria;p_Firmicutes;o_Bacilli;o_Lactobacillales;f_Streptococcaceae                     |
|  | k_Bacteria;p_Firmicutes;o_Bacilli;o_Turicibacteriales;f_Turicibacteraceae                  |
|  | k_Bacteria;p_Firmicutes;o_Clostridia;o_Clostridiales;Other                                 |
|  | k_Bacteria;p_Firmicutes;o_Clostridia;o_Clostridiales;f_                                    |
|  | k_Bacteria;p_Firmicutes;o_Clostridia;o_Clostridiales;f_Clostridiaceae                      |
|  | k_Bacteria;p_Firmicutes;o_Clostridia;o_Clostridiales;f_Dehalobacteriaceae                  |
|  | k_Bacteria;p_Firmicutes;o_Clostridia;o_Clostridiales;f_Lachnospiraceae                     |
|  | k_Bacteria;p_Firmicutes;o_Clostridia;o_Clostridiales;f_Peptostreptococcaceae               |
|  | k_Bacteria;p_Firmicutes;o_Clostridia;o_Clostridiales;f_Ruminococcaceae                     |
|  | k_Bacteria;p_Firmicutes;o_Clostridia;o_Clostridiales;f_Mogibacteriaceae                    |
|  | k_Bacteria;p_Firmicutes;o_Erysipelotrichi;o_Erysipelotrichales;f_Erysipelotrichaceae       |
|  | k_Bacteria;p_Proteobacteria;c_Alphaproteobacteria;o_Caulobacteriales;f_Caulobacteraceae    |
|  | k_Bacteria;p_Proteobacteria;c_Alphaproteobacteria;o_Rickettsiales;f_mitochondria           |
|  | k_Bacteria;p_Proteobacteria;c_Gammaproteobacteria;o_Enterobacteriales;f_Enterobacteriaceae |
|  | k_Bacteria;p_Tenericutes;o_Mollicutes;o_Anaeroplasmatales;f_Anaeroplasmataceae             |
|  | k_Bacteria;p_Tenericutes;o_Mollicutes;o_RF39;f_                                            |
|  | k_Bacteria;p_Verrucomicrobia;o_Verrucomicrobiae;o_Verrucomicrobiales;f_Verrucomicrobiaceae |

**Figure S2.** Legends of bacterial orders or families with each color representing an individual bacterial order or family, respectively.
